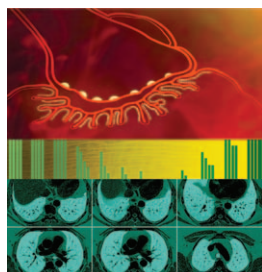

## ON THE COVER:

Neuromuscular-blocking agents (NMBAs) allow for surgical procedures that would be difficult or impossible without induced paralysis. In this issue of ANESTHESIOLOGY, McLean and his colleagues demonstrate a dose-dependent association between intermediate-acting NMBAs and postoperative respiratory complications. In an accompanying Editorial View, Brull and Prielipp make a plea to all clinicians: to reduce complications, use objective measurement of neuromuscular function in *all* patients receiving NMBAs to guide the timing and dosing of neuromuscular blockade and its reversal.

- McLean *et al.*: Dose-dependent Association between Intermediate-acting Neuromuscular-blocking Agents and Postoperative Respiratory Complications, p. 1201
- Brull and Prielipp: Reversal of Neuromuscular Blockade: "Identification Friend or Foe," p. 1183

## ◆ THIS MONTH IN ANESTHESIOLOGY

1A

## ■ SCIENCE, MEDICINE, AND THE ANESTHESIOLOGIST

21A

## ■ INFOGRAPHICS IN ANESTHESIOLOGY

23A

## ◆ EDITORIAL VIEWS

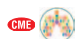

### Reversal of Neuromuscular Blockade: "Identification Friend or Foe"

1183

*S. J. Brull and R. C. Prielipp*

### Intraoperative Glycemic Control to Prevent Delirium after Cardiac Surgery: Steering a Course between Scylla and Charybdis

1186

*M. Berger, J. Browndyke, and J. P. Mathew*

### How Long Does Incisional Pain Last: Early Life Vulnerability Could Make It Last a Lifetime

1189

*D. G. Ririe*

### Future of Anesthesiology Is Perioperative Medicine: A Call for Action

1192

*Z. N. Kain, J. C. K. Fitch, J. R. Kirsch, B. Mets, and R. G. Pearl*

### What Would a Proper Explanation of Anesthesia Look Like?

1196

*J. Sleight and D. Hight*

### ANESTHESIOLOGY: Attracting the Best New Science in the Specialty

1198

*J. C. Eisenach*

◆ Refers to This Month in Anesthesiology

◆ Refers to Editorial Views

 This is a Mechanical Ventilation article

 See Supplemental Digital Content

 CME Article

 Best Abstract article originally presented at ANESTHESIOLOGY 2014

## ■ PERIOPERATIVE MEDICINE

## CLINICAL SCIENCE

-  **Dose-dependent Association between Intermediate-acting Neuromuscular-blocking Agents and Postoperative Respiratory Complications** 1201  
*D. J. McLean, D. Diaz-Gil, H. N. Farhan, K. S. Ladha, T. Kurth, and M. Eikermann*
- In a review of nearly 50,000 subjects, use of intermediate-acting neuromuscular blockers was associated with a dose-dependent increase in pulmonary complications. Neostigmine also was associated with a dose-dependent increase in pulmonary complications although exploratory analysis suggested that this reflected lack of neostigmine dose adjustment using neuromuscular transmission monitoring.
- ◆◆ **Intraoperative Tight Glucose Control Using Hyperinsulinemic Normoglycemia Increases Delirium after Cardiac Surgery** 1214  
*L. Saager, A. E. Duncan, J.-P. Yared, B. D. Hesler, J. You, A. Deogaonkar, D. I. Sessler, and A. Kurz*
- Intraoperative hyperinsulinemic–normoglycemia augments the risk of delirium after cardiac surgery, but not its severity.
- ◆ **Preexisting Cognitive Impairment Is Associated with Postoperative Cognitive Dysfunction after Hip Joint Replacement Surgery** 1224  
*B. Silbert, L. Evered, D. A. Scott, S. McMahon, P. Choong, D. Ames, P. Maruff, and K. Jamrozik*
- Preexisting cognitive dysfunction was identified in approximately a third of the patients before surgery. Preexisting cognitive dysfunction is a good predictor of cognitive dysfunction 1 yr after surgery. However, there is no evidence that anesthesia and surgery *per se* contribute to cognitive dysfunction 1 yr after surgery.
- Effect of Therapeutic Hypercapnia on Inflammatory Responses to One-lung Ventilation in Lobectomy Patients** 1235  
*W. Gao, D.-D. Liu, D. Li, and G.-x. Cui*
- Fifty patients undergoing lobectomy under intravenous anesthesia randomly received carbon dioxide at partial pressures of 35 to 45 mmHg or 60 to 70 mmHg for approximately 210 min. The bronchoalveolar lavage fluid from the patients in the higher carbon dioxide group had decreased the total number of cells, total protein, and some cytokines after surgery.
- ◆ **Effects of Morphine and Midazolam on Pharyngeal Function, Airway Protection, and Coordination of Breathing and Swallowing in Healthy Adults** 1253  
*A. I. Hårdemark Cedborg, E. Sundman, K. Bodén, H. Witt Hedström, R. Kuylensstierna, O. Ekberg, and L. I. Eriksson*
- By simultaneous recordings of breathing, videoradiography, and pharyngeal manometry in healthy adult volunteers, this study is the first to elucidate pharyngeal dysfunctions in conjunction with altered coordination between breathing and swallowing as possible mechanisms for pulmonary aspiration during sedation with midazolam or morphine.
- Monitoring Obstetric Anesthesia Safety across Hospitals through Multilevel Modeling** 1268  
*J. Guglielminotti and G. Li*
- In an analysis of nearly 500,000 labor and delivery records from 144 hospitals in New York, multilevel modeling substantially improved the reliability in the estimated rates of obstetric anesthesia-related adverse events across hospitals compared with the traditional risk-adjustment method.
- ◆ **Comparison of Surgical Pleth Index–guided Analgesia with Conventional Analgesia Practices in Children: A Randomized Controlled Trial** 1280  
*J. H. Park, B. G. Lim, H. Kim, I. O. Lee, M. H. Kong, and N. S. Kim*
- Children assigned to surgical pleth index guidance received less intraoperative fentanyl. However, they suffered more emergence agitation, had more postoperative pain, and required more rescue fentanyl.

## BASIC SCIENCE

**Opioid-induced Respiratory Depression Is Only Partially Mediated by the preBötzinger Complex in Young and Adult Rabbits *In Vivo***

1288

A. G. Stucke, J. R. Miller, I. Prkic, E. J. Zuperku, F. A. Hopp, and E. A. E. Stuth

In an *in vivo* rabbit model, the preBötzinger Complex partially mediates opioid effects on respiratory phase timing. The preBötzinger Complex does not mediate the opioid-induced depression of respiratory rate.

**Activation of Adenosine Triphosphate-regulated Potassium Channels during Reperfusion Restores Isoflurane Postconditioning-induced Cardiac Protection in Acutely Hyperglycemic Rabbits**

1299

J. Raphael, Y. Gozal, N. Navot, and Z. Zuo

Adenosine triphosphate-regulated potassium channel activation restored anesthetic postconditioning-induced myocardial protection under acute hyperglycemia. This effect occurred without increasing protein kinase B (Akt) or endothelial nitric oxide synthase phosphorylation, suggesting that adenosine triphosphate-regulated potassium channels are located downstream to Akt and endothelial nitric oxide synthase in the pathway of isoflurane-induced myocardial postconditioning.

**Xenon Treatment Protects against Remote Lung Injury after Kidney Transplantation in Rats**

1312

H. Zhao, H. Huang, R. Ologunde, D. G. Lloyd, H. Watts, M. P. Vizcaychipi, Q. Lian, A. J. T. George, and D. Ma

Xenon given to kidney transplant recipients after receiving the ischemic renal grafts decreased pulmonary damage and inflammation. The molecular mechanisms involved in the pulmonary protection are likely due to the mammalian target of rapamycin-hypoxia-inducible factor-1 $\alpha$  pathway activation and the high-mobility group protein-1/Toll-like receptor-4/nuclear factor- $\kappa$ B signaling pathway inhibition by xenon.

## ■ CRITICAL CARE MEDICINE

## BASIC SCIENCE

**Valproic Acid Attenuates Acute Lung Injury Induced by Ischemia-Reperfusion in Rats**

1327

S.-Y. Wu, S.-E. Tang, F.-C. Ko, G.-C. Wu, K.-L. Huang, and S.-J. Chu

The administration of valproic acid decreased all the parameters of lung injury, oxidative stress, apoptosis, and inflammation and some of its protection appeared to occur by increasing heme oxygenase-1 activity.

**BA TRPV4 Is Required for Hypoxic Pulmonary Vasoconstriction**

1338

N. M. Goldenberg, L. Wang, H. Ranke, W. Liedtke, A. Tabuchi, and W. M. Kuebler

A role for the calcium-permeant transient receptor potential channel TRPV4 in hypoxic pulmonary vasoconstriction was demonstrated in mouse models *in vivo* and *in vitro* both pharmacologically and in Trpv4<sup>-/-</sup> mice. TRPV4 is critical for hypoxia-induced pulmonary vasoconstriction, in contrast to its vasodilatory roles in renal and mesentery arteries.

**Relationship between Autophagy and Ventilator-induced Diaphragmatic Dysfunction**

1349

I. Azuelos, B. Jung, M. Picard, F. Liang, T. Li, C. Lemaire, C. Giordano, S. Hussain, and B. J. Petrof

Autophagy was rapidly induced in the diaphragm in a mouse model of ventilator-induced diaphragmatic dysfunction, but the autophagic process was not responsible for diaphragmatic weakness.

## CONTENTS

### ■ PAIN MEDICINE

#### CLINICAL SCIENCE

- Computational Analysis of Kilohertz Frequency Spinal Cord Stimulation for Chronic Pain Management** 1362  
*S. F. Lempka, C. C. McIntyre, K. L. Kilgore, and A. G. Machado*

Using a computational model, it was shown that kilohertz frequency spinal cord stimulation (KFSCS) used at clinical intensities probably does not cause the direct activation or conduction block of dorsal column or dorsal root fibers. Possible sites of action for KFSCS to be explored include synaptic terminals, cell bodies, and dendrites. Computational analyses suggest that KFSCS for pain management may not function through direct activation or conduction block of spinal cord fibers, and alternative concepts should be explored and evaluated.

#### BASIC SCIENCE

- ◆◆ **Targeting p38 Mitogen-activated Protein Kinase to Reduce the Impact of Neonatal Microglial Priming on Incision-induced Hyperalgesia in the Adult Rat** 1377  
*F. Schwaller, S. Beggs, and S. M. Walker*

In rats, incisional surgery in adulthood resulted in greater phosphorylation of the signaling enzyme, p38 mitogen-activated protein (MAP) kinase in spinal cord microglia of animals which had received incisional surgery in the neonatal period. A p38 MAP kinase inhibitor reduced pain behaviors after surgery in adults with previous neonatal surgery, suggesting this enzyme may be a target to reduce exaggerated pain responses after surgery in individuals with a history of neonatal surgery.

- ◆◆ **Surgical Injury in the Neonatal Rat Alters the Adult Pattern of Descending Modulation from the Rostroventral Medulla** 1391  
*S. M. Walker, M. Fitzgerald, and G. J. Hathway*

In rats, neonatal incisional surgery to the paw resulted in reduced sensitivity to mechanical or thermal stimuli in adulthood and changed the effect of rostroventral medulla stimulation from a bimodal pattern of facilitation and inhibition, to only inhibition. Regional anesthesia at the time of neonatal surgery prevented these changes in adulthood.

- Adenosine Monophosphate-activated Protein Kinase Regulates Interleukin-1 $\beta$  Expression and Glial Glutamate Transporter Function in Rodents with Neuropathic Pain** 1401  
*D. W. Maixner, X. Yan, M. Gao, R. Yadav, and H.-R. Weng*

Nerve injury reduced adenosine monophosphate-activated protein kinase (AMPK) activity, increased inflammation, reduced glutamate transporter expression in the spinal cord, and induced thermal hyperalgesia. Activation of AMPK increased glutamate transporter activity and reduced neuropathic pain; by contrast, knockdown of AMPK induced allodynia. These data indicate that AMPK plays an important role in nociceptive processing in the spinal cord and extend the novel possibility of manipulation of AMPK activity as a therapeutic target in experimental models of pain.

### ■ EDUCATION

#### IMAGES IN ANESTHESIOLOGY

- Dobutamine-induced Intraventricular Obstruction: A “Dagger” to the Anesthetized Heart?** 1414  
*M. D. Fritock, M. N. Manento, and L. G. Segura*

#### REVIEW ARTICLE

- ◆◆ **The Role of Dendritic Signaling in the Anesthetic Suppression of Consciousness** 1415  
*K. Meyer*

General anesthetics suppress signal conduction along the apical dendrites of cortical pyramidal neurons. Thereby, they interfere with corticocortical top-down signals and cause a breakdown of the continuous predictive process that is core to conscious perception.

# CONTENTS

## MIND TO MIND

- Three Mothers and a Father** 1432  
*A. Murray*
- “This Is My First Time”—The Way of the Fearless** 1434  
*R. Goyal*

## ■ CORRESPONDENCE

- Correlation between the STOP-Bang Score and the Severity of Obstructive Sleep Apnea** 1436  
*F. Chung, P. Liao, and R. Farney*
- In Reply**  
*R. M. Corso, C. Gregoretti, A. Braghiroli, F. Fanfulla, and G. Insalaco*
- 
- Prehabilitation *versus* Rehabilitation** 1438  
*J. Bordes, M. Cardinal, and E. Kaiser*
- In Reply**  
*C. Gillis, L. S. Feldman, A. Gamsa, and F. Carli*
- 
- Effect of Thoracic Epidural Anesthesia on the Tolerance to Acute Normovolemic Anemia: Issues Warranting Comment** 1439  
*G. J. Crystal*
- In Reply**  
*A. Pape and O. Habler*
- 
- Inappropriate Trial of Cervical Epidural Injections** 1441  
*L. Manchikanti, R. M. Benyamin, and J. A. Hirsch*
- In Reply**  
*S. P. Cohen, S. Hayek, P. F. Pasquina, and Y. Vorobeychik*

## ■ ANESTHESIOLOGY REFLECTIONS FROM THE WOOD LIBRARY-MUSEUM

- From Greek to Arabic: “Tom Morton” Cigar Box Label, Part I** 1200  
*George S. Bause*
- Capitol Hill Bill: “Tom Morton” Cigar Box Label, Part II** 1252  
*George S. Bause*
- Identity Theft? “Tom Morton” Cigar Box Label, Part III** 1361  
*George S. Bause*

## ■ REVIEWS OF EDUCATIONAL MATERIAL

1445

## ■ ANNOUNCEMENTS

1446

## ■ ACKNOWLEDGMENT

1449

## ■ CAREERS & EVENTS

25A

## INSTRUCTIONS FOR AUTHORS

The most recently updated version of the Instructions for Authors is available at [www.anesthesiology.org](http://www.anesthesiology.org). Please refer to the Instructions for the preparation of any material for submission to ANESTHESIOLOGY.

Manuscripts submitted for consideration for publication must be submitted in electronic format. The preferred method is via the Journal's Web site (<http://www.anesthesiology.org>). Detailed directions for submissions and the most recent version of the Instructions for Authors can be found on the Web site (<http://www.anesthesiology.org>). Books and educational materials should be sent to Alan Jay Schwartz M.D., M.S.Ed., Director of Education, Department of Anesthesiology and Critical Care Medicine, The Children's Hospital of Philadelphia, 34th Street and Civic Center Blvd., Room 9327, Philadelphia, Pennsylvania 19104-4399. Requests for permission to duplicate materials published in ANESTHESIOLOGY should be submitted in electronic format, to the Permissions Department ([journalpermissions@lww.com](mailto:journalpermissions@lww.com)). Advertising and related correspondence should be addressed to Advertising Manager, ANESTHESIOLOGY, Lippincott Williams & Wilkins, Two Commerce Square, 2001 Market Street, Philadelphia, Pennsylvania 19103 (Web site: <http://www.wkdcenter.com/>). Publication of an advertisement in ANESTHESIOLOGY does not constitute endorsement by the Society or Lippincott Williams & Wilkins, Inc. of the product or service described therein or of any representations made by the advertiser with respect to the product or service.

**ANESTHESIOLOGY** (ISSN 0003-3022) is published monthly by Lippincott Williams & Wilkins, 16522 Hunters Green Parkway, Hagerstown, MD 21740-2116. Business office: Two Commerce Square, 2001 Market Street, Philadelphia, PA 19103. Periodicals postage paid at Hagerstown, MD, and at additional mailing offices. Copyright © 2015, the American Society of Anesthesiologists, Inc.

**Annual Subscription Rates:** *United States*—\$799 Individual, \$1566 Institution, \$319 In-training. *Rest of World*—\$843 Individual, \$1739 Institution, \$319 In-training. Single copy rate \$145. Subscriptions outside of North America must add \$52 for airfreight delivery. Add state sales tax, where applicable. The GST tax of 7% must be added to all orders shipped to Canada (Lippincott Williams & Wilkins' GST Identification #895524239, Publications Mail Agreement #1119672). Indicate in-training status and name of institution. Institution rates apply to libraries, hospitals, corporations, and partnerships of three or more individuals. Subscription prices outside the United States must be prepaid. Prices subject to change without notice. Subscriptions will begin with currently available issue unless otherwise requested. Visit us online at [www.lww.com](http://www.lww.com).

Individual and in-training subscription rates include print and access to the online version. Online-only subscriptions for individuals (\$257) and persons in training (\$257) are available to nonmembers and may be ordered by downloading a copy of the Online Subscription FAXback Form from the Web site, completing the information requested, and faxing the completed form to 301-223-2400/44 (0) 20 7981 0535. Institutional rates are for print only; online subscriptions are available via Ovid. Institutions can choose to purchase a print and online subscription together for a discounted rate. Institutions that wish to purchase a print subscription, please contact Lippincott Williams & Wilkins, 16522 Hunters Green Parkway, Hagerstown, MD 21740-2116; phone: 1-800-638-3030 (outside the United States 301-223-2300/44 (0) 20 7981 0525); fax: 301-223-2400/44 (0) 20 7981 0535. Institutions that wish to purchase an online subscription or online with print, please contact the Ovid Regional Sales Office near you or visit [www.ovid.com/site/index.jsp](http://www.ovid.com/site/index.jsp) and select Contact and Locations.

**Address for non-member subscription information, orders, or change of address:** Lippincott Williams & Wilkins, 16522 Hunters Green Parkway, Hagerstown, MD 21740-2116; phone: 1-800-638-3030 (outside the United States 301-223-2300/44 (0) 20 7981 0525); fax: 301-223-2400/44 (0) 20 7981 0535; email: [customerservice@lww.com](mailto:customerservice@lww.com). In Japan, contact LWW Japan Ltd., 3-23-14 Hongo, Bunkyo-ku, Tokyo 113, Japan; phone: 81-3-5689-5400; fax: 81-3-5689-5402; email: [bclaim@lww.co.jp](mailto:bclaim@lww.co.jp). In Bangladesh, India, Nepal, Pakistan, and Sri Lanka, contact Globe Publications Pvt. Ltd., B-13 3rd Floor, A Block, Shopping Complex, Naraina, Vihar, Ring Road, New Delhi 110028, India; phone: 91-11-25770411; fax: 91-11-25778876; email: [info@globepub.com](mailto:info@globepub.com).

**Address for member subscription information, orders, or change of address:** Members of the American Society of Anesthesiologists receive the print and online journal with their membership. To become a member or provide a change of address, please contact the American Society of Anesthesiologists, 1061 American Lane, Schaumburg, Illinois 60173-4973; phone: 847-825-5586; fax: 847-825-1692; email: [membership@ASAhq.org](mailto:membership@ASAhq.org). For all other membership inquiries, contact Lippincott Williams & Wilkins Customer Service Department, P.O. Box 1580, Hagerstown, MD 21741-1580; phone: 1-800-638-3030 (outside the United States 301-223-2300/44 (0) 20 7981 0525); fax: 301-223-2400/44 (0) 20 7981 0535; email: [memberservice@lww.com](mailto:memberservice@lww.com).

**Postmaster:** Send address changes to ANESTHESIOLOGY, P.O. BOX 1550, Hagerstown, MD 21740.

**Advertising:** Please contact Mike Prinzi, Field Sales Rep, Medical Journals, Lippincott Williams & Wilkins, 333 Seventh Avenue, 19th Floor, New York, NY 10001; tel: (800) 933-6525, fax: (646) 607-5479, e-mail: [Mike.Prinzi@wolterskluwer.com](mailto:Mike.Prinzi@wolterskluwer.com). For classified advertising: Keida Spurlock, Recruitment Advertising Representative, Lippincott Williams & Wilkins, Two Commerce Square, 2001 Market Street, Philadelphia, PA 19103; tel: (215) 521-8501, fax: (215) 689-2453. e-mail: [Keida.Spurlock@wolterskluwer.com](mailto:Keida.Spurlock@wolterskluwer.com).
